# Supplementary material for: Nurse interventions to improve medication adherence among discharged older adults: a systematic review
Source: Oxford University Press journal article supplement (doi:10.1093/ageing/afx076), 2017-04-24
Supplement: afx076_aa-16-0636-file001.docx [file afx076_aa-16-0636-file001.docx]

**Supplementary file 2**

**A systematic review of nurse interventions to improve medication adherence among discharged older adults.**

Search strategy: 8.11.2016

**___________________________________________________________________**

The following databases and plateforms will be searched without language restriction for published and unpublished papers:

- **MEDLINE Pubmed** (1946 to 2016)

S1 "Aged"[Mesh] OR elderly* [tiab] OR frail elderly* [tiab] OR older people* [tiab] OR older adult* [tiab] OR geriatric patient*[tiab]

S2 "Patient Discharge"[Mesh] OR "Continuity of Patient Care"[Mesh] OR "Inpatients"[Mesh] OR "Hospitalization"[Mesh] OR postdischarge* [tiab] OR hospital discharge* [tiab] OR transition* [tiab] OR hospital home* [tiab] OR discharge* [tiab] OR Home transition* [tiab] OR recent hospitalization* [tiab] OR peridischarge*[tiab] OR after hospitalization* [tiab] OR readmission* [tiab] OR re-hospitalization* [tiab] OR rehospitalization* [tiab] OR outpatient follow-up* [tiab]

S3 "Nursing"[Mesh] OR "Nursing Care"[Mesh] OR "Nurses"[Mesh] OR "Nurse-Patient Relations"[Mesh] OR "Models, Nursing"[Mesh] OR "Patient Care Team"[Mesh:NoExp] OR [Delivery of Health Care, Integrated](http://www.ncbi.nlm.nih.gov/mesh/68019033) [Mesh] OR Patient-Centered Care [Mesh] OR nursing care* [tiab] OR nurse* [tiab] OR nursing intervention* [tiab] OR nurse-patient relation* [tiab] OR nursing follow-up* [tiab] OR non-pharmacological intervention* [tiab] OR behavioral intervention* [tiab] OR interdisciplinary [tiab] OR nurse-pharmacist* [tiab] OR nurse-GP* [tiab] OR nurs*

S4 "Medication Adherence"[Mesh] OR "Patient Medication Knowledge"[Mesh] OR "Prescription Drug Misuse"[Mesh:NoExp] OR "Polypharmacy"[Mesh] OR "Drug Therapy"[Mesh:NoExp] OR "Medication Therapy Management"[Mesh] OR "Pharmaceutical Preparations/administration and dosage"[Mesh]

S5 non-adherence* [tiab] OR nonadherence [tiab] OR medication adherence* [tiab] OR medication compliance* [tiab] OR medication concordance* [tiab] OR treatment adherence* [tiab] OR medication overuse* [tiab] OR medication abuse* [tiab] OR postdischarge medication error* [tiab] OR discordant medication* [tiab] OR medication error* [tiab] OR poor adherence* [tiab] OR discharge medication* [tiab] OR posthospital medication* [tiab] OR medication management* [tiab] OR medication related* [tiab] OR medication discrepancy* [tiab] OR medication discrepancies* [tiab] OR medication education* [tiab] OR therapeutic regimen* [tiab] OR electronic monitor* [tiab] OR prescription refill* [tiab] OR pill dispenser* [tiab] OR pill count* [tiab]

S6 S1 AND S2 AND S3 AND S4 AND S5

- **CINAHL Complete** (1937 to 2016)

S1 (MH "Aged+")

S2 (MH "Medication Compliance") OR (MH "Polypharmacy") OR (MH "Drug Therapy")

S3 TIAB "non-adherence" OR "nonadherence" OR "medication adherence" OR "medication compliance" OR "medication concordance" OR "treatment adherence" OR "medication overuse" OR "medication abuse" OR "postdischarge medication error" OR "discordant medication" OR "medication error" OR "poor adherence" OR "discharge medication" OR "posthospital medication" OR "medication management" OR "medication related" OR "medication discrepancy" OR "medication discrepancies" OR "medication education" OR "therapeutic regimen" OR "electronic monitor" OR "prescription refill" OR "pill dispenser" OR "pill count"

S5 S2 or S3

S6 (MH "Discharge Planning") OR (MH "Patient Discharge Education") OR (MH "Patient Discharge") OR (MH "Early Patient Discharge") OR (MH "Transfer, Discharge") OR (MH "inpatients") OR (MH "Aged, Hospitalized") OR (MH "Continuity of Patient Care") OR (MH "Readmission") OR (MH "After Care") OR (MH "hospitalization")

S7 TIAB "discharge" OR "postdischarge" OR "hospital discharge" OR "transition" OR "hospital home" OR "home transition" OR "recent hospitalization" OR "peridischarge" OR "after hospitalization" OR "readmission" OR "re-hospitalization" OR "rehospitalization" OR "outpatient follow-up"

S8 S6 or S7

S9 S1 and S5 and S8

- **EMBASE** (1947 to 2016)

1 ('geriatric patient'/exp OR 'aged'/exp)

2 ('nursing'/exp OR 'nurse'/exp OR nurs*:ti,ab)

3 ('medication compliance'/exp OR 'medication error'/exp OR 'polypharmacy'/exp)

4 ('non-adherence':ab,ti OR 'nonadherence':ab,ti OR 'medication adherence':ab,ti OR 'medication concordance':tiab OR 'medication compliance':ab,ti OR 'treatment adherence':ab,ti OR 'medication overuse':ab,ti OR 'medication abuse':ab,ti OR 'postdischarge medication error':ab,ti OR 'discordant medication':ab,ti OR 'medication error':ab,ti OR 'poor adherence':ab,ti OR 'discharge medication':ab,ti OR 'posthospital medication':ab,ti OR 'medication management':ab,ti OR 'medication related':ab,ti OR 'medication discrepancy':ab,ti OR 'medication discrepancies':ab,ti OR 'medication education':ab,ti OR 'therapeutic regimen':ab,ti)

5 ('hospital discharge'/exp OR 'hospital patient'/exp OR 'hospitalization'/exp)

6 (postdischarge*:ab,ti OR 'hospital discharge':ab,ti OR transition*:ab,ti OR 'hospital home':ab,ti OR discharge*:ab,ti OR 'home transition':ab,ti OR 'recent hospitalization':ab,ti)

6 3 or 4

7 5 or 6

7 1 and 2 and 6 and 7

- **PsycINFO** (1806 to 2016)

1. nurses/ or nursing/
2. treatment compliance/ or exp drug therapy/
3. exp hospital discharge/ or exp hospitalization/ or exp hospitalized patients/ OR exp discharge planning/ or exp hospital discharge/
4. #1 AND #2 AND #3
5. Limit 4 to ("380 aged <age 65 yrs and older>" or "390 very old <age 85 yrs and older>")

- **WEB OF SCIENCE** (1900 to 2016)

**TOPIC:** (aged OR old OR elderly OR geriatric)

*AND*

**TOPIC:** (medication)

*AND*

**TOPIC:** (nurse OR nursing)

*AND*

**TOPIC:** (discharge)

- **Banque de données en santé publique** (1878-2016)

Mcl=(([personne agee] OU [geriatrie]) ET ([observance therapeutique] OU [medicament])

ET (([sortie] OU [mode sortie] OU discharge))

- **CENTRAL (Cochrane Central Register of Controlled Trials)** (1992 to 2016)

Field « keywords, title, abstract » : (aged OR old* OR elder* OR geriatric*) AND medication* AND nurs* AND discharge*

## International Pharmaceutical Abstracts (1970 to 2016)

| 1. (nurse* or nursing).mp. [mp=title, subject heading word, registry word, abstract, trade name/generic name] |
| --- |
| 1. ("hospital discharge" or hospitalization or "hospitalized patient" or "discharge planning" or "hospital discharge" or "discharge" or "postdischarge" or "hospital discharge" or "transition" or "hospital home" or "home transition" or "recent hospitalization" or "peridischarge" or "after hospitalization" or "readmission" or "re-hospitalization" or "rehospitalization" or "outpatient follow-up").mp. [mp=title, subject heading word, registry word, abstract, trade name/generic name] |
| 1. ("non-adherence" or "nonadherence" or "medication adherence" or "medication compliance" or "medication concordance" OR "treatment adherence" or "medication overuse" or "medication abuse" or "postdischarge medication error" or "discordant medication" or "medication error" or "poor adherence" or "discharge medication" or "posthospital medication" or "medication management" or "medication related" or "medication discrepancy" or "medication discrepancies" or "medication education" or "therapeutic regimen" or "electronic monitor" or "prescription refill" or "pill dispenser" or "pill count" or "treatment compliance" or "drug therapy").mp. [mp=title, subject heading word, registry word, abstract, trade name/generic name] |
| 1. (aged or old* or elder* or geriatric).mp. [mp=title, subject heading word, registry word, abstract, trade name/generic name |
| 1. 1 and 2 and 3 and 4 |
|  |

- **TRIPDATABASE** (1997 to 2016)

## (nursing medication discharge elderly)

- **Dissertations and Theses Abstracts Proquest** (1861-2016)

su(older people) AND su(nursing) AND su(discharge OR hospitals) AND medication

- **Worldcat**

kw:nursing medication discharge elderly

kw:adhésion thérapeutique personne âgée

- **Google Scholar**

(aged OR old OR elderly OR geriatric) AND medication AND (nursing OR nurse) AND (discharge)

- **Mednar**

(aged OR old OR elderly OR geriatric) AND medication AND (nursing OR nurse) AND (discharge)

- **Clinicaltrials.gov**

(aged OR old OR elderly OR elder OR geriatric) AND ("medication adherence" OR "medication compliance" OR "medication concordance") AND (nurse OR nursing OR interdisciplinary) AND discharge

**SYSTEMATIC REVIEWS**

- **Cochrane Library Reviews** (1992 to 2016)

Field « keywords, title, abstract » : (aged OR old OR elder* OR geriatric) AND medication* AND nurs* AND discharge

- **Joanna Briggs Institute (JBI) database** (1998 to 2016)

1.aged.mp

2.medication.mp

3.discharge.mp

4. #1 AND #2 AND #3

- **Campbell Library** (2003-2016)

(aged OR elderly OR geriatric OR old) AND medication AND nurs*

**Database of Abstracts of Reviews (DARE)** (1996 to 2016)

(medication) AND (nursing) AND (elderly)

(medication) AND (discharge) AND (elderly)
